# 1 Taxon cycles in Neotropical mangroves

2  
3 **Valentí Rull**

4 *Botanic Institute of Barcelona, Spanish National Research Council (CSIC), Pg. del Migdia s/n,*  
5 *08038 Barcelona, Spain. Email [vrull@csic.es](mailto:vrull@csic.es)*

## 6 7 **Abstract**

8  
9 The concept of taxon cycle involves successive range expansions and contractions over time  
10 through which a species can indefinitely maintain its core distribution. Otherwise, it becomes  
11 extinct. Taxon cycles have been defined mostly for tropical island faunas, examples from  
12 continental areas are scarce and similar case studies for plants remain unknown. Most taxon  
13 cycles have been identified on the basis of phylogeographic studies, and straightforward  
14 empirical evidence from fossils is lacking. Here, empirical fossil evidence is provided for  
15 recurrent Eocene to present expansion/contraction cycles in a mangrove taxon (*Pelliciera*),  
16 after a Neotropical-wide study of the available pollen records. This recurrent behavior is  
17 compatible with the concept of taxon cycle from biogeographical, chronological and ecological  
18 perspectives. The biotic and abiotic drivers potentially involved in the initiation and  
19 maintenance of the *Pelliciera* expansion/contraction cycles are analyzed, and the ecological  
20 and evolutionary implications are discussed. Whether this could be a trend toward extinction  
21 is considered under the predictions of the taxon cycle theory. The recurrent expansion and  
22 contraction cycles identified for *Pelliciera* have strong potential for being the first empirically  
23 and unequivocally documented taxon cycles and likely the only taxon cycles documented to  
24 date for plants.

25  
26 **Keywords:** expansion/contraction cycles, taxon cycles, Neotropical mangroves, *Pelliciera*,  
27 *Rhizophora*, fossil pollen, relict distribution, range shifts

28  
29  
30  
31  
32  
33  
34  
35  
36  
37  
38  
39  
40  
41  
42  
43  
44  
45  
46  
47  
48  
49  
50  
51

52 **1. Introduction**

53

54 The concept of taxon cycle was introduced by Wilson (1961) to describe the biogeographical  
55 and evolutionary dynamics of species that experience successive range expansions and  
56 contractions over time linked to adaptive ecological shifts. According to this author, a taxon  
57 can maintain its core distribution area, which he called the headquarters, in a given land mass  
58 indefinitely by expanding and contracting its geographical range recurrently. Otherwise, it  
59 becomes extinct. In the taxon cycle, expanding and contracting species populations have  
60 disparate geographical patterns and adaptive features that allow subdivision of the process  
61 into four main stages (Ricklefs & Cox, 1972) (Fig. 1A). In stage I, high-density expanding  
62 populations rapidly colonize new environments but bear low morphological differentiation  
63 across their geographical range. These taxa have high reproductive potential and broad habitat  
64 tolerance, and have been called supertramps (Diamond, 1974). Expansion slows down in stage  
65 II, and population differentiation significantly increases, especially near the range margins. The  
66 taxa corresponding to this stage are known as great speciators (Diamond et al., 1976). Stage III  
67 is characterized by geographical stasis and local extinction leading to fragmented distributions  
68 and incipient speciation, which may trigger the onset of a new cycle. If this is not the case, a  
69 gradual decline in range size and intraspecific diversity takes place, leading to a progressive  
70 relictualization (stage IV) and eventually to extinction (Pepke et al., 2019). According to Ricklefs  
71 & Bermingham (2002), the main contribution of the taxon cycle concept to biogeography is the  
72 focus on the evolutionary consequences of ecological interactions among colonizing and  
73 autochthonous (resident) species, which influence their extinction dynamics and shape their  
74 geographical distribution patterns.

75

76 Originally, taxon cycles were defined to explain the biogeographical patterns of island biotas  
77 (Wilson, 1959), and although Ricklefs & Bermingham (2002) pointed out that they may also  
78 occur in continental environments, archipelagos remain the most common targets. Special  
79 emphasis has been placed on animal groups (crustaceans, insects, reptiles, birds) from tropical  
80 islands and archipelagos (Caribbean Antilles, Indonesia, Melanesia, New Guinea, Philippines,  
81 Madagascar) (e.g., MacLean & Holt, 1979; Losos, 1992; Jones et al., 2001; Cook et al., 2008;  
82 Simberloff & Collins, 2010; Economo & Sarnat, 2012; Jønsson et al., 2014; Economo et al.,  
83 2015; Fuchs et al., 2016; Dalsgaard et al., 2018; Matos-Maraví et al., 2018; Oliver et al., 2018;  
84 O'Connell et al., 2019; Cozzarolo et al., 2019; Liu et al., 2020; Cognato et al., 2021). Few case  
85 studies are available from continental areas. For example, a meta-analysis of a widely  
86 distributed bird group (Campefagidae) from tropical Asia, Africa and Australia, including insular  
87 and continental areas, has been considered to be consistent with the taxon cycle concept  
88 (Pepke et al., 2019). Another case is the diversification of Central American salamanders of the  
89 supergenus *Bolitoglossa* (Plethodontidae) (Garcia-Paris et al., 2000). In plants, similar case  
90 studies seem to be lacking. In agreement with Sheh et al. (2020), the author has been unable  
91 to find examples providing empirical support for the predictions of the taxon cycle theory. A  
92 single molecular phylogenetic study on the plant tribe Gaultherieae (Ericaceae) has been  
93 found, suggesting that fruit color might follow a process similar to a taxon cycle (Lu et al.,  
94 2019).

95

96 Initially, the occurrence of taxon cycles was attributed to changing biotic interactions, notably  
97 competition and predation, rather than to shifts in environmental drivers (Wilson, 1961;  
98 Ricklefs & Cox, 1972). Later, it was realized that the estimated duration of taxon cycles in  
99 Caribbean birds, based on molecular phylogenetic analyses, was on the order of  $10^5$ - $10^7$  years  
100 (Ricklefs & Bermingham, 2002), which is much longer than the period of most climatic drivers  
101 of cyclic nature, especially the Pleistocene glacial-interglacial cycles, which have periods of  
102 0.02-1-0.1 million years (my) (Hays et al., 1976). Therefore, the idea of a biotic origin and  
103 control was reinforced. Further studies using similar methods estimated taxon-cycle

104 periodicities of ~5 my for Indo-Pacific birds (Jønsson et al., 2014; Pepke et al., 2018) and  
105 reaffirmed the idea that Pleistocene climatic cycles could have not been important drivers.  
106 However, these authors suggested that other environmental shifts of greater periodicities,  
107 such as plate collision or orogenesis, could have been involved (Pepke et al., 2019). It has also  
108 been suggested that biotic drivers play a major role in the expansion phase, whereas abiotic  
109 drivers are more influential in the retraction phase (Žliobaitė & Stenseth, 2017). In all these  
110 works, the duration of taxon cycles was deduced from phylogenetic divergence times, which  
111 are usually estimated using molecular clock assumptions or are modeled using a variety of  
112 indirect methods (Ho, 2020). Therefore, according to Parenti & Ebach (2013), phylogenetic  
113 divergence times are hypotheses, not empirical evidence.

114  
115 The fossil record could provide straightforward evidence and more reliable chronologies, but  
116 unequivocal fossil evidence for taxon cycles is still lacking. Range expansion-contraction cycles  
117 have been observed in the fossil record (Foote, 2007; Foote et al., 2007; Liow & Stenseth,  
118 2007; Žliobaitė & Stenseth, 2017) but have not been analyzed from a taxon-cycle perspective  
119 (Pepke et al., 2019). According to Lopez-Martinez (2009), this is due to the difficulty of  
120 detecting the chronological and geographical origin of a species. Some paleontologists argue  
121 that the waxing and waning of fossil species follow symmetric trends (Foote, 2007) but Lopez-  
122 Martinez (2009) considers the taxon-cycle model as a good example of a time-asymmetric  
123 biogeographical and evolutionary process, as the initial dispersion phase (stage I) is usually  
124 much faster – and, hence, much more difficult to document in the fossil record – than the  
125 ensuing contraction/diversification and further extinction phases (stages II to IV). As a result,  
126 fossils would be able to account mainly for phases II to IV, whereas phase I would remain  
127 hidden (likely condensed) and represented only by the seemingly synchronous appearance of  
128 the species in a more or less wide area (e.g., Brunet et al., 1995) (Fig. 1B). According to the  
129 punctuated equilibrium model of evolution, this asymmetry should be viewed as an intrinsic  
130 feature of the fossil record – and, therefore, of the evolutionary process itself – rather than an  
131 imperfection of the fossil, as usually considered (Eldredge & Gould, 1972; Gould & Eldredge,  
132 1977). In summary, according to the asymmetric model, the last appearance datum (LAD) of a  
133 fossil reliably records its extinction but its first appearance datum (FAD) does not record its  
134 actual time and place of origin but of its initial spreading (Fig. 1B).

135  
136 *Pelliciera* Planch. & Triana (Triana & Planchon) – also reported as *Pelliceria* in some early  
137 publications – is a genus of Neotropical mangrove trees of the family Tetrameristaceae –  
138 formerly in the Theaceae or the Pellicieraceae, as reported in a number of classical papers –  
139 which has traditionally been considered monotypic (*P. rhizophorae*) but has recently been split  
140 into two species: *P. rhizophorae* (Planch. & Triana) N.C. Duke and *P. benthamii* Planch. & Triana  
141 (Duke, 2020). These species are currently restricted to a small patch along the Caribbean and  
142 Pacific coasts of Central America and northwestern South America – called here the present  
143 *Pelliciera* range or PPR (Fig. 2) – which has been considered to be a relict of the larger, nearly  
144 pan-Neotropical distribution attained by *Pelliciera* during Tertiary times (Wijmstra, 1968;  
145 Graham, 1977, 1995; Rull, 1998, 2001).

146  
147 Presently, *Pelliciera* is rare and restricted to sites with low or moderate salinity in the  
148 understory of *Rhizophora*-dominated mangrove forests (Dangremond et al., 2015). Recent  
149 autecological studies have shown that *Pelliciera* is highly sensitive to light intensity and salinity,  
150 and the combination of high levels of these environmental stressors leads to increased  
151 mortality, lower photosynthesis rates and reduced growth. When this species grows in shade  
152 conditions, however, it can tolerate high salinities, which suggests that light intensity is the  
153 main limiting factor. As a result, this taxon is unable to establish in sites with an open canopy  
154 and grows in the understory beneath the canopy of other tree species that, in the case of  
155 Central America, is provided by *Rhizophora mangle*, which is more tolerant to environmental

156 stressors (Dangremond et al., 2015). It has also been reported that the scarcity of nutrients  
157 such as nitrogen and phosphorus can limit the growth of *Pelliciera*, leading to the development  
158 of dwarf forms (Dangremond & Feller, 2014). In general, *Pelliciera* is considered to be a  
159 stenotopic taxon bearing a relatively narrow and specialized niche.

160

161 Reconstruction of past biogeographical patterns and trends of *Pelliciera* are based on its fossil  
162 representative, the morphological pollen species *Lanagiopollis crassa* (van der Hammen &  
163 Wijmstra) Frederiksen, which also appears in the literature under the synonym  
164 *Psilatricolporites crassus* van der Hamen & Wijmstra (Wijmstra, 1968). This pollen originated  
165 locally in the Early Eocene but did not attain significant abundances until the Middle Eocene  
166 (Germeraad et al., 1968), when it became the dominant tree in the Neotropical mangrove  
167 communities (Rull, 2022a). By the time, *Rhizophora* (represented by the fossil pollen  
168 *Zonocostites ramonae* Germeraad, Hopping & Muller), currently the most abundant mangrove-  
169 forming tree in Neotropical coasts, was still absent in the region and arrived later, in the Mid-  
170 Late Eocene, likely by long-distance dispersal from the Indo-Pacific region, crossing the Atlantic  
171 through the Tethys seaway (Takayama et al., 2021). *Rhizophora* acquired its present dominant  
172 status during the Eocene/Oligocene Transition (hereafter EOT), which represented a global  
173 disruption characterized by a rapid cooling (which inaugurated the Cenozoic icehouse Earth's  
174 state) and a sea-level fall that heavily influenced the Earth's biota in the form of enhanced  
175 extinction and intense biotic turnover (Coxall & Pearson, 2007; Hutchinson et al., 2021).

176

177 In the Neotropics, the EOT signified a revolution for mangrove communities as the former  
178 Eocene *Pelliciera*-dominated mangroves disappeared and this tree turned into a minor  
179 subordinate element of the *Rhizophora*-dominated communities. However, this did not lead to  
180 the extinction of *Pelliciera*. Rather, this taxon was much more widespread across the  
181 Neotropics after losing its dominance than it was before and is today (Graham, 1977, 1995;  
182 Rull, 1998, 2001), which represents a major biogeographical challenge. Several explanations  
183 have been proposed to account for the Miocene-present *Pelliciera* reduction, including  
184 climatic and/or salinity stress, sea-level shifts or competition with *Rhizophora*, among others  
185 (Wijmstra, 1968; Fuchs, 1970; Graham, 1977, 1995; Jiménez, 1984; Rull, 1998, 2001). However,  
186 there are some methodological weaknesses that should be addressed before analyzing the  
187 potential causes for the *Pelliciera* biogeographical trends. First, although the idea of a post-  
188 Miocene range reduction was based on the analysis of barely a dozen of fossil records, this  
189 view has perpetuated until today with no further reconsideration based on an updated fossil  
190 database. Second, this reduction is only part of the story about the Cenozoic range shifts of  
191 *Pelliciera*, as pre-Miocene evidence has also not been analyzed under the same premises of a  
192 representative spatiotemporal fossil record. Third, most pollen records on which previous  
193 hypotheses were based consisted of qualitative (presence/absence) and pseudoquantitative  
194 (abundant, common, scarce) records, and it has been demonstrated that quantitative data are  
195 essential to properly record and understand the evolution of Neotropical mangroves (Rull,  
196 2022a).

197

198 This paper uses an updated fossil pollen database of almost 80 widely distributed qualitative  
199 and quantitative Neotropical pollen records to reconstruct the biogeographical trends of  
200 *Pelliciera* since its Early Eocene origin to the present. This analysis revealed the occurrence of a  
201 long-term expansion-contraction loop that would be compatible with the concept of taxon cycle,  
202 sensu Wilson (1961). Therefore, this would be not only the first evidence for a taxon cycle in  
203 plants but also a strong support for a taxon cycle, in general, as it is based on empirical,  
204 straightforward and chronologically accurate evidence, rather than on phylogenetic  
205 assumptions and modeling. The biogeographical cycle identified in this way is discussed in  
206 ecological and evolutionary terms using the known ecological traits of the taxa involved,  
207 primarily *Pelliciera* and *Rhizophora*, under the above-mentioned predictions of the conceptual

208 model of Wilson (1961) and further updates. External (environmental) drivers potentially  
209 involved in the *Pelliciera* taxon cycle are also discussed. Considering the present features of  
210 *Pelliciera* populations, in comparison with its previous biogeographical history, the possible  
211 future developments are also evaluated.

212

## 213 **2. Materials and methods**

214

215 The data used in this paper are from the available literature; more information exists in the  
216 databases of oil companies but it is not publicly available. Efforts to make this information  
217 public, as is the case of Germeraad et al. (1968) and Lorente (1986), are worth to be made.  
218 After a comprehensive literature survey, almost 80 fossil mangrove pollen records were  
219 identified with data useful to reconstruct the biogeographical history of *Pelliciera* and  
220 *Rhizophora* in the Neotropics from the Eocene to the present. Almost half of these sites (45%)  
221 have quantitative data (percentages) and slightly more than a quarter (26%) have only  
222 presence/absence records; the rest have subjective measures such as abundant, common or  
223 rare. Ages are provided as geological epochs (Eocene, Oligocene, Miocene, Pliocene,  
224 Pleistocene and Holocene). In some cases, there is not enough chronological precision to  
225 resolve between them and longer ranges are indicated (e.g., Oligo-Miocene, Mio-Pliocene).  
226 The lack of site coordinates in many original references has prevented precise estimations of  
227 range sizes using statistical methods (Darroch & Saupe, 2018; Darroch et al., 2020);  
228 Carotenudo et al., 2020).

229

## 230 **3. Results**

231

232 The results obtained are displayed in Figure 3. Raw data (Table S1) and detailed figures for  
233 each time interval (Figs. S1 to S5) are provided as Supplementary Material. During the Eocene  
234 (17 Sites, including the two labeled as Eocene/Oligocene), *Pelliciera* was common or abundant  
235 in most localities, with maximum percentages up to 60%. The distribution area was restricted  
236 to NW South America (presently Colombia and Venezuela), with one site in eastern central  
237 America (Panama) and another on the Caribbean island of Jamaica. *Rhizophora* was present  
238 only in six localities, attaining some relevance (<10%) in only one site from Panama. In the  
239 Oligocene and Oligo-Miocene (18 Sites), a significant abundance decline is observed in  
240 *Pelliciera*, which falls to values below 5%, except in two localities from Venezuela. *Rhizophora*  
241 shows a reverse trend and is common or abundant in a significant number of sites, attaining  
242 values between 50 and 90% in four of them, situated in Guyana, Mexico, Venezuela and  
243 Puerto Rico. Regarding the distribution, *Pelliciera* shows a dramatic expansion in both  
244 latitudinal and longitudinal senses, ranging from Mexico and Puerto Rico to Brazil.

245

246 During the Miocene (36 sites), the decline in the abundance of *Pelliciera* continued and  
247 disappeared from 8 localities, reaching values of 3% only in five Venezuelan and one  
248 Panamanian site. The geographical distribution was similar to that in the Oligocene but with a  
249 slight displacement toward the SW. In contrast, *Rhizophora* became abundant in most  
250 Miocene records with values up to 90%. In the Pliocene (8 localities, including some labeled as  
251 Mio-Pliocene), *Pelliciera* was only present and its range was restricted to the southern  
252 Caribbean margin (northern South America and Central America), whereas *Rhizophora*  
253 attained values of 70-100% in three sites and was present in others. No records exist for the  
254 Pleistocene and a few records are available for the Holocene (e.g., Horn, 1985; Jaramillo &  
255 Bayona, 2000), which are restricted to the PPR.

256

257 Shifts in the geographical range of *Pelliciera* represented in Fig. 3 can be subdivided into four  
258 main phases (Fig. 4). During the first phase (Eocene to Oligocene), the range expanded to most  
259 of the Neotropics but the populations experienced a significant reduction, which resulted in a

260 more diluted distribution. This phase is called thinning expansion here, as the term dilution has  
261 already been used in biogeography for other processes (Keesing et al., 2006, 2010). The second  
262 phase (Oligocene to Miocene) was a displacement phase, where the range slightly migrated to  
263 the NW, with no significant differences with respect to the Oligocene situation. During the  
264 third phase (Miocene to Pliocene), the range underwent a major contraction toward the  
265 southern Caribbean margin. Finally, in the fourth phase (Pliocene to present) the range did not  
266 experience further reductions but showed a longitudinal contraction around Central America  
267 and a southward migration toward the Equator, which is considered a spatial reorganization.  
268 In summary, the range of *Pelliciera* significantly expanded from its original NW South American  
269 cradle until a Miocene maximum encompassing most of the Neotropics to initiate a retraction  
270 that ended in the present PPR, which is very similar in location and extent to the Eocene range.  
271 This biogeographical loop was accompanied by a dramatic decline in the *Pelliciera* populations,  
272 which was abrupt in the EOT and gradual between the Oligocene and the present (Fig. 5). If we  
273 consider that the Eocene *Pelliciera* mangroves attained their maximum extent in the Lutetian  
274 (Middle Eocene) (Rull, 1998, 2022a), the minimum duration of the overall *Pelliciera*  
275 biogeographical loop was approximately 45 my.

276

#### 277 4. Discussion

278

279 The *Pelliciera* loop, as documented in the fossil record, is straightforward empirical evidence  
280 for an expansion-contraction cycle, whose duration ( $\sim 4 \cdot 10^7$  y) and biogeographical expression  
281 are consistent with the concept of taxon cycle, sensu Wilson (1961). Whether this cycle truly  
282 corresponds to a taxon cycle is discussed in more depth, with special consideration of the  
283 potential ecological and evolutionary implications.

284

285 First, it should be noted that the expansion phase (Eocene to Miocene) was much longer than  
286 expected under the asymmetric model, which postulates that phase I is too fast to be  
287 detectable in the fossil record (Fig. 1B). According to the asymmetric predictions, phase I  
288 should be condensed in the Eocene, when *Pelliciera* was already expanded across NW South  
289 America, Central America and the Greater Antilles (Fig. 3). To verify this possibility, the Eocene  
290 records (Fig. 2) have been subdivided into Early Eocene, Middle Eocene and Late Eocene (Table  
291 1), revealing the occurrence of an intra-Eocene contraction-expansion loop (Fig. 6). According  
292 to this reconstruction, *Pelliciera* would have originated in the Early Eocene in western  
293 Venezuela and expanded relatively fast, attaining a maximum in the Middle Eocene, to further  
294 retreat (Late Eocene) to an area similar but not identical to its original range (Fig. 6). Therefore,  
295 the true stage I would have occurred between the Early and Middle Eocene. The exact  
296 duration of this loop is difficult to establish but a maximum estimate could be the total  
297 duration of the Eocene epoch, which is 22 my ( $\sim 2 \cdot 10^7$  y). Using the same reasoning, stage I  
298 would have lasted a maximum of 10 my ( $10^7$  y).

299

300 Evidence for population differentiation and eventual speciation should be sought on pollen  
301 morphology, which has demonstrated to be useful to differentiate extant *Pelliciera* species and  
302 subspecific taxa (Castillo-Cárdenas et al., 2014, 2015; Duke, 2020). The main diagnostic  
303 characters are size and exine (the outer pollen wall) sculpture. Fossil *Pelliciera* pollen (*L. crassa*  
304 or *P. crassus*) also exhibits significant morphological variability in these diagnostic characters  
305 from the Eocene to the Pliocene (Germeraad et al., 1968; Frederiksen, 1985; Lorente, 1986;  
306 Muller et al., 1987; Jaramillo & Dilcher, 2001). Unfortunately, no systematic records of this  
307 variability exist in the fossil record that enable to distinguish among possible taxonomic  
308 categories. This should be addressed in future studies, but with the available fossil evidence,  
309 the occurrence of different species and/or subspecies cannot be dismissed.

310

311 Regarding ecological preferences, most paleoecological studies using pollen rely on a  
312 reasonable degree of niche constancy over time (niche conservatism), especially at the genus  
313 level, in long-lasting communities (Wiens & Graham, 2005; Hadly et al., 2009; Wiens et al.,  
314 2010), which is the case of mangroves. Therefore, it is likely that fossil *Pelliciera* species were  
315 also stenotopic, as extant species are. This would be especially true in the Eocene, as the  
316 maximum recorded expansion of the *Pelliciera* range did not progress beyond tropical warm  
317 and wet climates, and is very similar to the present range, characterized by average  
318 temperatures of ~27 °C and total annual precipitation values up to ~3000 mm (Castillo-  
319 Cárdenas et al. 2015; Dangremond et al., 2015). It is especially noteworthy that extant  
320 *Pelliciera* grows around one of the most humid areas of the world, the Chocó region, (Fig. 2),  
321 with precipitation values reaching 13,000 mm y<sup>-1</sup> (Yepes et al., 2019). During the Eocene,  
322 climates were significantly warmer than at present and global average temperatures were ~8-  
323 14 °C above present temperatures (Westerhold et al., 2020), which would indicate  
324 macrothermal conditions for fossil *Pelliciera* species.

325

326 The first records of *Rhizophora* dated from the Middle Eocene and extended up to the Late  
327 Eocene in the form of scattered appearances, always around the initial and final Eocene ranges  
328 of *Pelliciera* (Table 1). The only exception is a Panamanian site (67), where *Rhizophora* reached  
329 10% of the pollen assemblage during the Late Eocene. These occurrences represent the first  
330 stages of colonization of the Neotropics by *Rhizophora*, which coincides with the results of  
331 recent molecular phylogeographical studies that situate the origin of this genus in the Indo-  
332 Pacific region and its worldwide spreading in the Mid-Late Eocene (Takayama et al., 2021).  
333 According to the same authors, *Rhizophora* could have reached the Neotropics by the Atlantic  
334 Ocean, via the Tethys seaway. The use of this pathway cannot be supported or dismissed by  
335 paleogeographic reconstructions and fossil pollen records, as both Atlantic and Pacific seaways  
336 to the Caribbean were open for dispersal during the whole Eocene (Romito & Mann, 2020;  
337 Mann, 2021), and the fossil records do not show a clear Atlantic or Pacific pattern (Fig. 6).  
338 Once more, the only exception is site 67, which was situated in the Pacific island arc of the  
339 western Caribbean plate margin during the Eocene, which opens the door to an eventual  
340 Pacific dispersal pathway, but more studies are needed for a sound assessment.

341

342 The Oligocene to Miocene *Pelliciera* expansion (thinning expansion) started from a small area  
343 in NW South America, at the intersection between the Eocene and the present ranges (Figs. 4  
344 and 6). Since the beginning, this expansion has followed the expansion of *Rhizophora*, the  
345 dominant mangrove tree. This change in dominance would have been greatly influenced by  
346 the EOT environmental disruption, in combination with biotic interactions. The EOT cooling  
347 would have affected a stenotypic macrothermic taxon such as *Pelliciera* and favored the  
348 development of the more eurytopic and climatically tolerant *Rhizophora*. In addition to its  
349 wider environmental tolerance, *Rhizophora* is an aggressive colonizer with a high dispersal  
350 potential, as its propagules are able to remain floating and viable for a year or more in  
351 saltwater. In contrast, the *Pelliciera* propagules have a maximum flotation period of barely a  
352 week and a maximum viability of roughly a couple of months, and their dispersal occurs  
353 primarily over short distances transported by coastal currents (Rabinowitz, 1978; Van de  
354 Stocken et al., 2019). The whole picture may suggest that the competitive superiority of  
355 *Rhizophora* could have led to the extinction of *Pelliciera*, but in contrast, this taxon not only  
356 survived but also expanded its range at the same pace of *Rhizophora* (Fig. 4). This could be  
357 explained by a combination of two types of biotic interactions known as facilitation and niche  
358 segregation.

359

360 Facilitation occurs when a species provides refuge to another in the face of environmental  
361 stress, predation or competition, thus allowing its survival (Boucher et al., 1982; Callaway,  
362 1995; Stachowicz, 2001; Bruno et al., 2003). Niche segregation refers to the spatial, temporal

363 or functional divergence of the niches of two competing species that allows the survival of  
364 both (MacArthur & Levins, 1967; Violle et al., 2011; Kosicki, 2022). As quoted above for extant  
365 mangroves, *Pelliciera* is highly sensitive to environmental stressors, and its growth is facilitated  
366 by *R. mangle*, which provides a favorable microhabitat in the mangrove understory  
367 (Dangremond et al., 2015). The maintenance of this specialized microhabitat could be  
368 explained by the fact that, although eurytopic generalists are apt to live in a wide range of  
369 environmental conditions – and, therefore, able to invade the specialist’s microhabitat –  
370 stenotopic specialists are more efficient within the restricted set of conditions in which they  
371 can develop (Futuyma & Moreno, 1988).

372

373 Using these ecological relationships as modern analogs for EOT mangroves, the *Pelliciera* to  
374 *Rhizophora* dominance shift without competitive exclusion could be viewed as a tradeoff in  
375 which the newly arrived eurytopic generalist (*Rhizophora*) outcompeted the resident  
376 stenotopic specialist (*Pelliciera*) in terms of dominance and, in exchange, facilitated a  
377 microhabitat to the loser, which “accepted” to play a secondary role in order to survive. In  
378 addition to survival, *Pelliciera* acquired the opportunity to expand its range across the whole  
379 Neotropics beyond its macroenvironmental niche boundaries, during the Oligocene and the  
380 Miocene. This would have been hardly possible without the facilitation of *Rhizophora*, as  
381 suggested by the permanent restriction of *Pelliciera* within its comfort zone (or the  
382 headquarters, in the words of Wilson, 1961) during the whole Eocene, when *Rhizophora* was  
383 absent. Given the dispersal mode of *Pelliciera*, typically over short distances through coastal  
384 currents, its expansion should have been by diffusion, that is, gradual migration across  
385 hospitable terrains, rather than by long-distance dispersal, which implies crossing inhospitable  
386 lands (Pielou, 1977). This suggests that *Rhizophora* must have been the pioneering colonizer,  
387 and once the mangrove community was developed and the microhabitat suitable for *Pelliciera*  
388 was created, this taxon would have been able to establish. Therefore, during its maximum  
389 Oligo-Miocene expansion, *Pelliciera* likely survived as a diffuse network of small populations  
390 restricted to favorable microhabitats, which is supported by mangrove fossil pollen records of  
391 this age, which are widespread but show very low pollen percentages, when present. This  
392 spatial arrangement and ecological dynamics fit with the concept of microrefugia, specifically  
393 the diffuse type, which promotes genetic differentiation among populations of the same  
394 species (Rull, 2009). Paraphrasing Fernández-Palacios et al. (2021), the ecological loser could  
395 have had unprecedented opportunities for diversification and become an evolutionary winner.

396

397 From an environmental point of view, the expansion of *Pelliciera* occurred in a phase of  
398 extended climatic stability spiked only by minor shifts (Westerhold et al., 2019), which  
399 suggests that biotic interactions were the main drivers in this part of the cycle. It is important  
400 to emphasize that the Oligo-Miocene spreading – whose duration is difficult to estimate due to  
401 the lack of enough temporal resolution in the fossil record – was the second expansion of  
402 *Pelliciera*, after the first occurred during the Early-Mid Eocene around the original range and its  
403 further Late Eocene contraction. Therefore, *Pelliciera* experienced at least two  
404 expansion/contraction cycles since the Eocene. The causes for the occurrence of the first cycle  
405 remain unknown but the second was likely triggered by the Late Eocene arrival of *Rhizophora*,  
406 which not only provided new spreading and diversification opportunities but also physically  
407 mediated the process, as a niche builder and an indirect dispersal agent (actually an ecological  
408 nurse). It is not possible to know whether *Pelliciera* would have become extinct without the  
409 arrival of *Rhizophora*, as its range was receding but, if so, *Rhizophora* could have provided the  
410 conditions for *Pelliciera* to overcome this bottleneck. Therefore, the ecological winner would  
411 have been not only the ecological nurse for the ecological loser but also its evolutionary  
412 rescuer. Considering the evolutionary dimension of these ecological interactions, *Rhizophora*,  
413 which likely began as a competitor, would have been much more than a lifesaver for *Pelliciera*,  
414 becoming with time a real sponsor/benefactor.



415  
416 The Miocene-Pliocene contraction occurred after a significant cooling known as the Middle  
417 Miocene Cooling Transition (MMCT) (Westerhold et al., 2019). No evident changes were  
418 observed in the fossil pollen record, and hence, this contraction could have been more  
419 influenced by climatic than by biotic drivers. Obviously, the Pliocene restriction to the southern  
420 Caribbean margin was due to the local extinction of all Miocene *Pelliciera* populations outside  
421 this area, as predicted by the taxon cycle theory. It is possible that *Pelliciera* was unable to  
422 endure a second cooling, even under the protection of *Rhizophora*, and survived only in the  
423 sector of its range where temperature and precipitation remained favorable. This would be  
424 supported by the fact that the observed contraction had a clear latitudinal component. The  
425 reorganization that occurred between the Pliocene and the present is more enigmatic for two  
426 main reasons. On the one hand, the present distribution is based on actual records of living  
427 populations, while former distributions have been inferred from fossil pollen assemblages,  
428 which are subjected to a variety of taphonomic processes not affecting living plants. On the  
429 other hand, there is a gap between the Pliocene and the present, as no pollen records of  
430 *Pelliciera* are available for the Pleistocene and only a few Holocene records have been  
431 documented (e.g., Horn 1985; Jaramillo & Bayona, 2000). This prevent us from knowing how  
432 Pleistocene glaciations, the coolest phases of the whole Cenozoic era, affected the range of  
433 *Pelliciera*. Knowing the macrothermic nature of this taxon, it is expected that glaciations  
434 significantly affected its populations, but no evidence of this possibility is available to date.  
435  
436 An additional factor characteristic of the last millennia, which was absent in former geological  
437 epochs, is the presence of humans, whose influence on *Pelliciera* is largely unknown, except  
438 for the last decades. *P. rhizophorae* has been listed as “Vulnerable” – that is, under a high risk  
439 of extinction in the wild due to its small (500-2000 km<sup>2</sup>) and fragmented distribution area – in  
440 the IUCN Red List of Threatened Species (Polidoro et al., 2010; Blanco et al., 2012; Bhowmik et  
441 al., 2022). Urban expansion has been recognized as a major threat for *Pelliciera* populations,  
442 which are being heavily fragmented and threatened by habitat loss (Blanco-Libreros &  
443 Ramírez-Ruiz, 2021). From a biogeographical perspective, the available evidence suggests that,  
444 rather than shrinking the distribution area of *Pelliciera* as a whole, human activities have  
445 caused its severe fragmentation, which affects population viability and increases the sensitivity  
446 to extreme events and global warming (Blanco-Libreros & Ramírez-Ruiz, 2021). In the context  
447 of the taxon cycle, it could be asked whether the total extinction of *Pelliciera* is approaching  
448 and how human activities could contribute to accelerating this end. It is possible that, if the  
449 IUCN considers this view, *Pelliciera* would be transferred to the category Critically Endangered  
450 and considered a conservation priority. It is difficult to envisage the emergence of another  
451 evolutionary rescuer similar to *Rhizophora* that prevented the extinction of *Pelliciera* and  
452 promoted its expansion thus initiating an eventual third cycle. Humans could be able to do this  
453 through conservation/restoration actions, but we should seriously ask ourselves if we have the  
454 right to artificially preserve a taxon that is naturally headed to extinction (Rull, 2022b).  
455  
456 To summarize, the *Pelliciera* expansion-contraction cycles documented in the fossil pollen  
457 record since the Eocene have strong potential for being considered taxon cycles, sensu Wilson  
458 (1961), from chronological, biogeographical and ecological perspectives. Evolutionary  
459 predictions are more difficult to evaluate solely on the basis of the available pollen records and  
460 complementary evidence is needed for a sound assessment. Two main aspects remain to be  
461 analyzed in more detail in further studies, namely phase chronology and population  
462 diversification. Regarding the first, more precision is needed to accurately estimate the  
463 duration of the cycles and their respective phases. With reference to the second, more  
464 systematic pollen morphological studies, along with the use of molecular phylogenetic  
465 techniques, are required to document potential differentiation patterns among fossil  
466 populations. This paper has tried to maximize the utility of the information available in the

467 literature in this sense. However, the existing studies were not aimed at demonstrating the  
468 existence of taxon cycles, which hinders more robust conclusions. With this in mind, further  
469 studies can be devised with the specific target of testing the evolutionary predictions of the  
470 taxon cycle model. Hopefully, this paper has provided a number of testable hypotheses that  
471 are worth exploring in this line. If confirmed, the *Pelliciera* cycles would be the first taxon  
472 cycles supported by straightforward empirical evidence and the first known taxon cycle for  
473 plants.

474

#### 475 **Acknowledgments**

476

477 No funding was received specifically for the development of this work.

478

479

480

481

482

483

484

485

486

487

488

489

490

491

492

493

494

495

496

497

498

499

500

501

502

503

504

505

506

507

508

509

510

511

512

513

514

515

516

517

518

519 **References**

- 520
- 521 Bhowmik, A.K., Padmanaban, R., Cabral, P., Romeiras, M.M. 2022. Global mangrove  
522 deforestation and its interacting social-ecological drivers: a systematic review and  
523 synthesis. *Sustainability* 14, 4433.
- 524 Blanco, J.F., Estrada, E.A., Ortiz, L.F., Urrego, L.E. 2012. Ecosystem-wide impacts of  
525 deforestation in mangroves: the Urabá Gulf (Colombian Caribbean) case study. *ISRN*  
526 *Ecology* 2012, 958709.
- 527 Blanco-Libreros, J.F., Ramírez-Ruiz, K. 2021. Threatened mangroves in the Anthropocene:  
528 habitat fragmentation in urban coastalscapes of *Pelliciera* spp. (Tetrameristaceae) in  
529 northern South America. *Frontiers in Marine Science* 8, 670354.
- 530 Boucher, D.H., James, S., Keeler, K.H. 1982. The ecology of mutualism. *Annual Reviews of*  
531 *Ecology and Systematics* 13, 315-347.
- 532 Brunet, M., Beauvilain, A., Coppens, Y., Heintz, E., Moutaye, A.H.E., Pildeam, D. 1995. The first  
533 Australopithecine 2,500 km west of the Rift Valley (Chad). *Nature* 378, 273-275.
- 534 Bruno, J.F., Stachowicz, J.J., Bertness, M.D. 2003. Inclusion of facilitation into ecological theory.  
535 *Tree* 18, 119-125.
- 536 Callaway, R.M. 1995. Positive interactions among plants (interpreting botanical progress).  
537 *Botanical Review* 61, 306-349.
- 538 Carotenuto, F., Di Febbraro, M., Mondanaro, A., Castiglione, S., Serio, C., Melchionna, M., et al.  
539 2020. MInOSSE: A new method to reconstruct geographic ranges of fossil species.  
540 *Methods in Ecology and Evolution* 11, 1121-1132.
- 541 Castillo-Cárdenas, M.F., Díaz-Gonzales, F., Cerón-Souza, I., Sanjur, O., Toro-Perea, N. 2014.  
542 Jumping a geographical barrier: diversification of the mangrove species *Pelliciera*  
543 *rhizophorae* (Tetrameristaceae) across the Central American Isthmus. *Tree Genetics &*  
544 *Genomes* 11, 1-11.
- 545 Castillo-Cárdenas, M.F., Ramirez-Silva, J.A., Sanjur, O., Toro-Perea, N. 2015. Evidence of  
546 incipient speciation in the Neotropical mangrove *Pelliciera rhizophorae*  
547 (Tetrameristaceae) as revealed by molecular, morphological, physiological and climatic  
548 characteristics. *Botanical Journal of the Linnean Society* 179, 499-510.
- 549 Cognato, A.I., Smith, S.M., Jordal, B.H. 2021. Patterns of host tree use within a lineage of  
550 saproxylic snout-less weevils (Coleoptera; Curculionidae; Scolytinae; Scolytini). *Molecular*  
551 *Phylogenetics and Evolution* 159, 107107.
- 552 Cook, B.D., Pringle, C.M., Hughes, J.M. 2008. Molecular evidence for sequential colonization  
553 and taxon cycling in freshwater decapod shrimps on a Caribbean Island. *Molecular*  
554 *Ecology* 17, 1066-1075.
- 555 Coxall, H.K., Pearson, P.N. 2007. The Eocene-Oligocene transition. In: Williams, M., Haywood,  
556 A.M., Gregory, F.J., Schmidt, D.N. (eds.), *Deep-Time Perspectives on Climate Change:*  
557 *Marrying the Signal from Computer Models and Biological Proxies.* The Geological Society,  
558 London, pp. 351-387.
- 559 Cozzarolo, C.-S., Balke, M., Buerki, S., Arrigo, N., Pitteloud, C., Gueuning, M., et al. 2019.  
560 Biogeography and ecological diversification of a mayfly clade in New Guinea. *Frontiers in*  
561 *Ecology and Evolution* 7, 233.
- 562 Dalsgaard, B., Kennedy, J.D., Simmons, B.I., Baquero, A.C., Martín González, A.M.,  
563 Timmermann, A., et al. 2018. Trait evolution, resource specialization and vulnerability to  
564 plant extinctions among Antillean hummingbirds. *Proceedings of the Royal Society B* 285,  
565 20172754.
- 566 Dangremond, E.M., Feller, I.C. 2014. Functional traits and nutrient limitation in the rare  
567 mangrove *Pelliciera rhizophorae*. *Aquatic Botany* 116, 1-7.
- 568 Dangremond, E.M., Feller, I.V., Sousa, W.P. 2015. Environmental tolerances of rare and  
569 common mangroves along light and salinity gradients. *Oecologia* 179, 1187-1198.

- 570 Darroch, S.A., Saupe, E.E. 2018. Reconstructing geographic range-size dynamics from fossil  
571 data. *Paleobiology* 44, 25-39.
- 572 Darroch, S.A., Casey, M.M., Antell, G.S., Sweeney, A., Saupe, E.E. 2020. High preservation  
573 potential of paleogeographic range size distributions in deep time. *The American*  
574 *Naturalist* 196, 454-471.
- 575 Diamond, J.M. 1974. Colonization of exploded volcanic islands by birds: the supertramp  
576 strategy. *Science* 184, 803-806.
- 577 Diamond, J.M., Gilpin, M.E., Mayr, E. 1976. Species-distance relation for birds of Solomon  
578 archipelago, and paradox of great speciators. *Proceedings of the National Academy of*  
579 *Sciences USA* 73, 2160-2164.
- 580 Duke, N.C. 2020. A systematic revision of the vulnerable mangrove genus *Pelliciera*  
581 (Tetramerisraceae) in equatorial America. *Blumea* 65, 107-120.
- 582 Economo, E.P., Sarnat, E.M. 2012. Revisiting the ants of Melanesia and the taxon cycle:  
583 historical and human-mediated invasions of a tropical archipelago. *The American*  
584 *Naturalist* 180, E1-E16.
- 585 Economo, E.P., Sarnat, E.M., Janda, M., Clouse, R., Klimov, P.B., Fischer, G., et al. 2015.  
586 Breaking out biogeographical modules: range expansion and taxon cycles in the  
587 hyperdiverse ant genus *Pheidole*. *Journal of Biogeography* 42, 2289-2301.
- 588 Eldredge, N., Gould, S.J. 1972. Punctuated equilibria: an alternative to phyletic gradualism. In:  
589 Schopf, T.J.M. (ed.), *Models in Paleobiology*. Freeman Cooper, San Francisco, pp. 193-223.
- 590 Fernández-Palacios, J.M., Otto, R., Borregaard, M.K., Kreft, H., Price, J.P., Steinbauer, M.J., et  
591 al. 2021. Evolutionary winners are ecological losers among oceanic island plants. *Journal*  
592 *of Biogeography* 48, 2186-2198.
- 593 Frederiksen, N. 1985. Review of Early Tertiary sporomorph paleoecology. *American Association*  
594 *of Stratigraphic Palynologists Contributions Series* 19, 1-92.
- 595 Foote, M. 2007. Symmetric waxing and waning of marine invertebrate genera. *Paleobiology*  
596 33, 517-529.
- 597 Foote, M., Crampton, J.S., Beu, A.G., Marshall, B.A., Cooper, R.A., Maxwell, P.A., et al. 2007.  
598 Rise and fall of species occupancy in Cenozoic fossil mollusks. *Science*, 318, 1131-1134.
- 599 Fuchs, H.P. 1970. Ecological and palynological notes on *Pelliciera rhizophorae*. *Acta Botanica*  
600 *Neerlandica* 19, 884-894.
- 601 Fuchs, J., Lemoine, D., Parra, J.L., Pons, J.-M., Raherilalao, M.J., Prys-Jones, R., et al. 2016. Long-  
602 distance dispersal and inter-island colonization across the western Malagasy Region  
603 explain diversification in brush-warblers (Passeriformes: *Nesillas*). *Biological Journal of the*  
604 *Linnean Society* 119, 873-889.
- 605 Futuyma, D.J., Moreno, G. 1988. The evolution of ecological specialization. *Annual Review of*  
606 *Ecology and Systematics* 19, 207-233.
- 607 Garcia-Paris, M., Good, D.A., Parra-Olea, G., Wake, D.B. 2000. Biodiversity of Costa Rican  
608 salamanders: implications of high levels of genetic differentiation and phylogeographic  
609 structure for species formation. *Proceedings of the national Academy of Sciences USA* 97,  
610 1640-1647.
- 611 Germeraad, J.H.; Hopping, C.A.; Muller, J. 1968. Palynology of Tertiary sediments from tropical  
612 areas. *Review of Palaeobotany and Palynology* 6, 189-348.
- 613 Gould, S.J., Eldredge, N. 1977. Punctuated equilibria: the tempo and mode of evolution  
614 reconsidered. *Paleobiology* 3, 115-151.
- 615 Graham, A. 1977. New records of *Pelliciera* (Theaceae/Pellicieriaceae) in the Tertiary of the  
616 Caribbean. *Biotropica* 9, 48-52.
- 617 Graham, A. 1995. Diversification of Caribbean/Gulf mangrove communities through Cenozoic  
618 time. *Biotropica* 27, 20-27.
- 619 Hadly, E.A., Spaeth, P.A., Li, C. 2009. Niche conservatism above the species level. *Proceedings*  
620 *of the national Academy of Sciences USA* 106, 19707-19714.

- 621 Hays, J.D., Imbrie, J., Shackleton, N.J. 1976. Variations in Earth's orbit: pacemaker of ice ages.  
622 Science 194, 1121-1132.
- 623 Ho, S.Y.W. 2020. The Molecular Evolutionary Clock. Theory and Practice. Springer Nature,  
624 Cham.
- 625 Horn, S. 1985. Preliminary pollen analysis of Quaternary sediments from Deep Sea Drilling  
626 Project site 565, western Costa Rica. DSDP Reports 84, 534-547.
- 627 Hutchinson, D.K., Coxall, H.K., Lunt, D.J., Steinthorsdottir, M., de Boer, A.M., Baatsen, M., et al.  
628 2021. The Eocene-Oligocene transition: a review of marine and terrestrial proxy data,  
629 models and model-data comparisons. Climate of the Past 17, 269-315.
- 630 Jaramillo, C., Bayona, G. 2000. Mangrove distribution during the Holocene in Tribugá Gulf,  
631 Colombia. Biotropica 32, 14-22.
- 632 Jaramillo, C., Dilcher, D.L. 2001. Middle Paleogene palynology of Central Colombia, South  
633 America: a study of pollen and spores from tropical latitudes. Palaeontographica B 258,  
634 87-213.
- 635 Jiménez, J.A. 1984. A hypothesis to explain the reduced distribution of the mangrove *Pelliciera*  
636 *rhizophorae* Tr and Pl. Biotropica 16, 304-308.
- 637 Jones, M.J., Sullivan, M.S., Marsden, S.J., Lindsley, M.D. 2001. Correlates of extinction risk of  
638 birds from two Indonesian islands. Biological Journal of the Linnean Society, 73, 65-79.
- 639 Jønsson, K.A., Irestedt, M., Christidis, L., Clegg, S.M., Holt, B.G., Fjeldså, J. 2014. Evidence of  
640 taxon cycles in an Indo-Pacific passerine bird radiation (Aves: *Pachycephala*). Proceedings  
641 of the Royal Society B 281, 20131727.
- 642 Keesing, F., Holt, R.D., Ostfeld, R.S. 2006. Effects of species diversity on disease risk. Ecology  
643 Letters 9, 485-498.
- 644 Keesing, F., Belden, L.K., Daszack, P., Dobson, A., Harvell, C.D., Holt, R.D., et al. 2010. Impacts  
645 of biodiversity on the emergence and transmission of infectious diseases. Nature 468,  
646 647-652.
- 647 Kosicki, J.Z. 2022. Niche segregation on the landscape scale of two co-existing related  
648 congeners in the sympatric zone – modelling approach. Ecological Modelling 468, 109960.
- 649 Liow, L.H. & Stenseth, N.C. 2007. The rise and fall of species: implications for  
650 macroevolutionary and macroecological studies. Proceedings of the Royal Society B:  
651 Biological Sciences 274, 2745-2752.
- 652 Liu, C., Sarnat, E.M., Friedman, N.R., Hita Garcia, F., Darwell, C., Booher, D., et al. 2020.  
653 Colonize, radiate, decline: unravelling the dynamics of island community assembly with  
654 Fijian trap-jaw ants. Evolution 74, 1082-1097.
- 655 Lopez-Martinez, N. 2009. Time asymmetry in the palaeobiogeographic history of species. Bulletin  
656 de la Societe geologique Française 180, 445-55.
- 657 Lorente, M.A. 1986. Palynology and palynofacies of the Upper Tertiary in Venezuela.  
658 Dissertationes Botanicae 99, 1-222.
- 659 Losos, J.B. 1992. A critical comparison of the taxon-cycle and character-displacement models  
660 for size evolution of *Anolis* lizards in the Lesser Antilles. Copeia 2, 279-288.
- 661 Lu, L., Fritsch, P.W., Matzke, N.J., Wang, H., Kron, K.A., Li, D.-Z., et al. 2019. Why is fruit color so  
662 variable? Phylogenetic analyses reveal relationships between fruit-color evolution,  
663 biogeography and diversification. Global Ecology & Biogeography 28, 891-903.
- 664 MacArthur, R., Levins, R. 1976. The limiting of similarity, convergence, and divergence of  
665 coexisting species. American Naturalist 10, 377-385.
- 666 MacLean, W.P., Holt, R.D. 1979. Distributional patterns in St. Croix *Sphaerodactylus* lizards: the  
667 taxon cycle in action. Biotropica 11, 189-195.
- 668 Mann, P. 2021. Gulf of Mexico, Central America, and the Caribbean. In: Alderton, D., Elias, S.A.  
669 (eds.), Encyclopedia of Geology. Academic Press, London, pp. 47-67.
- 670 Matos-Maraví, P., Matzke, N.J., Larabee, F.J., Clouse, R.M., Wheeler, W.C., Sorger, D.M., et al.  
671 2017. Taxon cycle predictions supported by model-based inference in Indo-Pacific trap-  
672 jaw ants (Hymenoptera: Formicidae: *Odontomachus*). Molecular Ecology 27, 4090-4107.

- 673 Muller, J., Di Giacomo, E., Ven Erve, A.W. 1987. A palynological zonation for the Cretaceous,  
674 Tertiary and Quaternary of Northern South America. American Association of  
675 Stratigraphic Palynologists Contributions Series 19, 7-76.
- 676 O'Connell, D.P., Kelly, D.J., Lawless, N., Karya, A., Analuddin, K., Marples, N.M. 2019.  
677 Diversification of a 'great speciator' in the Wallacea region: differing responses of closely  
678 related resident and migratory kingfisher species (Aves: Alcedinidae: *Todiramphus*). Ibis  
679 161, 806-823.
- 680 Oliver, P.M., Brown, R.M., Kraus, F., Rittmeyer, E., Travers, S.L., Siler, C.D. 2018. Lizards of the  
681 lost arcs: mid-Cenozoic diversification, persistence and ecological marginalization in the  
682 West Pacific. Proceedings of the Royal Society B 285, 20171760.
- 683 Parenti, L.R., Ebach, M.C. 2013. Evidence and hypothesis in biogeography. Journal of  
684 Biogeography 40, 813-820.
- 685 Pepke, M.L., Irestedt, M., Fjeldså, J., Rahbeck, C., Jønsson, K.A. 2019. Reconciling supertramps,  
686 great speciators and relict species with the taxon cycle stages of a large island radiation  
687 (Aves: Campephagidae). Journal of Biogeography 46, 1214-1225.
- 688 Pielou, E.C. 1977. Biogeography. J. Wiley & Sons, New York.
- 689 Polidoro, B.A., Carpenter, K.E., Collins, L., Duke, N.C., Ellison, A.M., Ellison, J.C., et al. 2010. The  
690 loss of species: mangrove extinction risk and geographic areas of global concern. PLoS  
691 ONE 5, e10095.
- 692 Rabinowitz, D. 1978. Dispersal properties of mangrove propagules. Biotropica 10, 47-57.
- 693 Ricklefs, R.E., Cox, G.C. 1972. Taxon cycles in the West Indian avifauna. The American  
694 Naturalist 106, 195-219.
- 695 Ricklefs, R.E., Bermingham, E. 2002. The concept of the taxon cycle in biogeography. Global  
696 Ecology & Biogeography 11, 353-361.
- 697 Romito, S., Mann, P. 2020. Tectonic terrains underlying the present-day Caribbean plate: their  
698 tectonic origin, sedimentary thickness, subsidence histories and regional controls on  
699 hydrocarbon resources. In: Davidson, I., Hull, J.N.F., Pindell, J. (eds.), The Basins, Orogens,  
700 and Evolution of the Southern Gulf of Mexico and Northern Caribbean. Geological Society,  
701 London, pp. 343-378.
- 702 Rull, V. 1998. Middle Eocene mangroves and vegetation changes in the Maracaibo Basin,  
703 Venezuela. Palaios 13, 287-296.
- 704 Rull, V. 2001. A quantitative palynological record from the early Miocene of western  
705 Venezuela, with emphasis on mangroves. Palynology 25, 109-126.
- 706 Rull, V. 2009. Microrefugia. Journal of Biogeography 36, 481-484.
- 707 Rull, V. 2022a. The Caribbean mangroves: an Eocene innovation with no Cretaceous  
708 precursors. Earth-Science Reviews 231, 104070.
- 709 Rull, V. 2022b. Biodiversity crisis or sixth mass extinction? EMBO Reports 23, e54193.
- 710 Sheh, S.N., Morueta-Holm, N., Angert, A.L. 2018. Determinants of geographic range size in  
711 plants. New Phytologist 226, 650-665.
- 712 Simberloff, D., Collins, M.D. 2010. The domain of the dynamic equilibrium theory and assembly  
713 rules, with comments on the taxon cycle. In: Losos, J.B., Ricklefs, R.E. (eds.), The Theory of  
714 Island Biogeography Revisited. Princeton University Press, Princeton, pp. 237-263.
- 715 Stachowicz, J.J. 2001. Mutualism, facilitation, and the structure of ecological communities.  
716 BioScience 51, 235-246.
- 717 Takayama, K., Tateishi, Y., Kaijita, T. 2021. Global phylogeography of a pantropical mangrove  
718 genus *Rhizophora*. Scientific Reports 11, 7228.
- 719 Van der Stocken, T., Carroll, D., Menemenlis, D., Simard, M., Koedam, N. 2019. Global-scale  
720 dispersal and connectivity in mangroves. Proceedings of the National Academy of Sciences  
721 USA 116, 915-922.
- 722 Violle, C., Nemergut, D.R., Pu, Z., Jiang, L. 2011. Phylogenetic limiting similarity and competitive  
723 exclusion. Ecology Letters 14, 782-787.

724 Westerhold, T., Marwan, N., Drury, A.J., Liebrand, D., Agnini, C., Anagnostou, E., et al. 2020. An  
725 astronomically dated record of Earth's climate and its predictability over the last 66  
726 million years. *Science* 369, 1383–1387.

727 Wiens, J.J., Graham, C.H. 2005. Niche conservatism: integrating evolution, ecology, and  
728 conservation biology. *Annual Review of Ecology, Evolution and systematics* 36, 519-539.

729 Wiens, J.J., Ackerly, D.D., Allen, A.P., Anacker, B.L., Buckley, L.B., Cornell, H.V., et al. 2010.  
730 Niche conservatism as an emerging principle in ecology and conservation biology. *Ecology*  
731 *Letters* 13, 1310-1324.

732 Wijmstra, T.A. 1968. The identity of *Psilatricolporites* and *Pelliciera*. *Acta Botanica Neerlandica*  
733 17, 114-116.

734 Wilson, E.O. 1959. Adaptive shifts and dispersal in a tropical ant fauna. *Evolution* 13, 122-144.

735 Wilson, E.O. 1961. The nature of the taxon cycle in the Melanesian ant fauna. *The American*  
736 *Naturalist* 95, 169-193.

737 Yepes, J., Poveda, G., Mejía, J.F., Moreno, L. Rueda, C. 2019. CHOCO-JEX a research experiment  
738 focused on the Chocó low-level jet over the far eastern Pacific and western Colombia.  
739 *Bulletin of the American Meteorological Society* 100, 779-796.

740 Žliobaitė, I., Fortelius, M., Stenseth, N.C. 2017. Reconciling taxon senescence with the Red Queen's  
741 hypothesis. *Nature*, 552, 92-95.

742  
743  
744  
745  
746  
747  
748  
749  
750  
751  
752  
753  
754  
755  
756  
757  
758  
759  
760  
761  
762  
763  
764  
765  
766  
767  
768  
769  
770  
771  
772  
773  
774  
775

776 **Figure captions**

777

778 **Figure 1.** The taxon cycle and its fossil expression. A) Variations in geographical extent and  
779 intraspecific differentiation along the stages of the taxon cycle (redrawn from Pepke et al.,  
780 2019). B) Variations in the geographical area of fossils according to the asymmetric model  
781 (Lopez-Martinez, 2009). The stages represented in the fossil record (gray area) and the  
782 condensed phase (CP), which is apparently unrecorded, are indicated. FAD, first appearance  
783 datum; LAD, last appearance datum.

784

785 **Figure 2.** Present distribution of *Pelliciera* species. A) Map of the Americas with the distribution  
786 area of *Pelliciera* highlighted by a red box. B) Close up of the occurrence patterns of the two  
787 *Pelliciera* species (modified from Duke, 2020). The Colombian Chocó region is highlighted  
788 because it is one of the most humid regions of the world, with precipitation values up to  
789 13,000 mm y<sup>-1</sup> (Yepes et al., 2019).

790

791 **Figure 3.** Graphical display of the results from Table S1 (Supplementary Material). Present  
792 *Pelliciera* localities have been taken from Fig. 2. Countries: B, Brasil; Bz, Belize; C, Colombia; CR,  
793 Costa Rica; Cu, E, Ecuador; ES, El Salvador; Cuba; FG, French Guiana; G, Guatemala; Gy,  
794 Guyana; H, Honduras; Hp, Hispaniola (Haiti and Santo Domingo); J, Jamaica; M, Mexico; N,  
795 Nicaragua; P, Panama; Pe, Peru; PR, Puerto Rico; S, Surinam; T, Trinidad & Tobago; V,  
796 Venezuela.

797

798 **Figure 4.** *Pelliciera* range shifts between the Eocene and the present, subdivided into four  
799 chronological phases.

800

801 **Figure 5.** Diagram of the *Pelliciera* biographical loop with indication of the ranges of  
802 abundance of its fossil pollen in each geological epoch. PPR, present *Pelliciera* range.

803

804 **Figure 6.** The Eocene expansion-contraction *Pelliciera* loop. A) Eocene localities (Fig. 3)  
805 subdivided into Early, Middle and Late Eocene ages (Table S1 of the Supplementary Material).  
806 Countries: C, Colombia; J, Jamaica; P, Panama; V, Venezuela. B) Early to Middle Eocene  
807 expansion. C) Middle to Late Eocene contraction. The initial Early Eocene range (A) is indicated  
808 by a broken line.

809

810

811

812

813

814

815

816

817

818

819

820

821

822

823

824

825

826

827



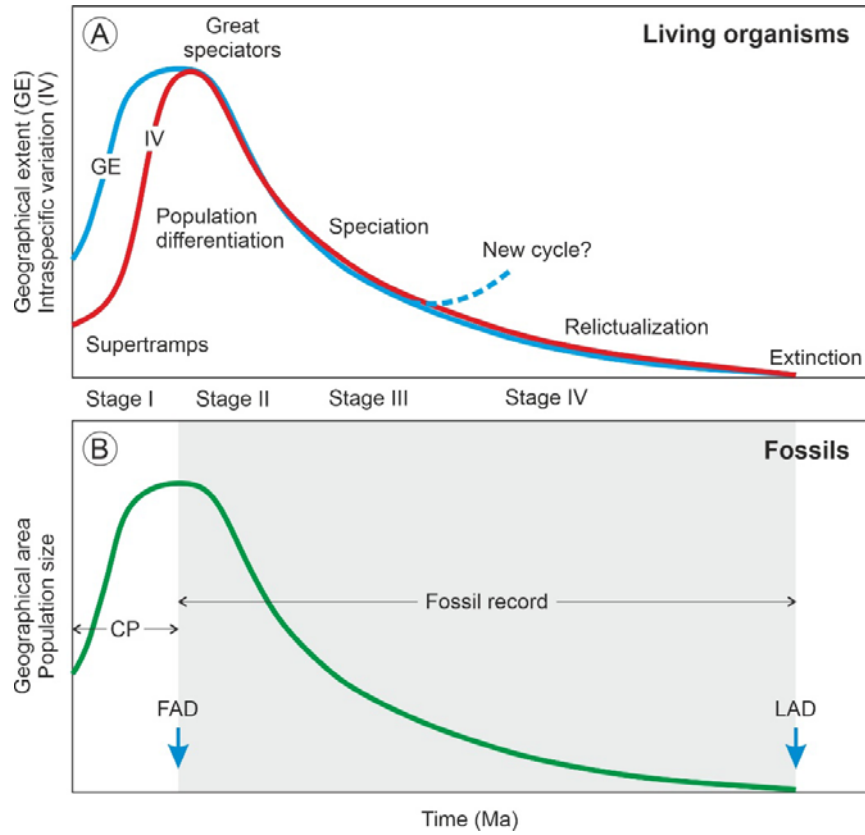

828  
829  
830  
831  
832

Figure 1

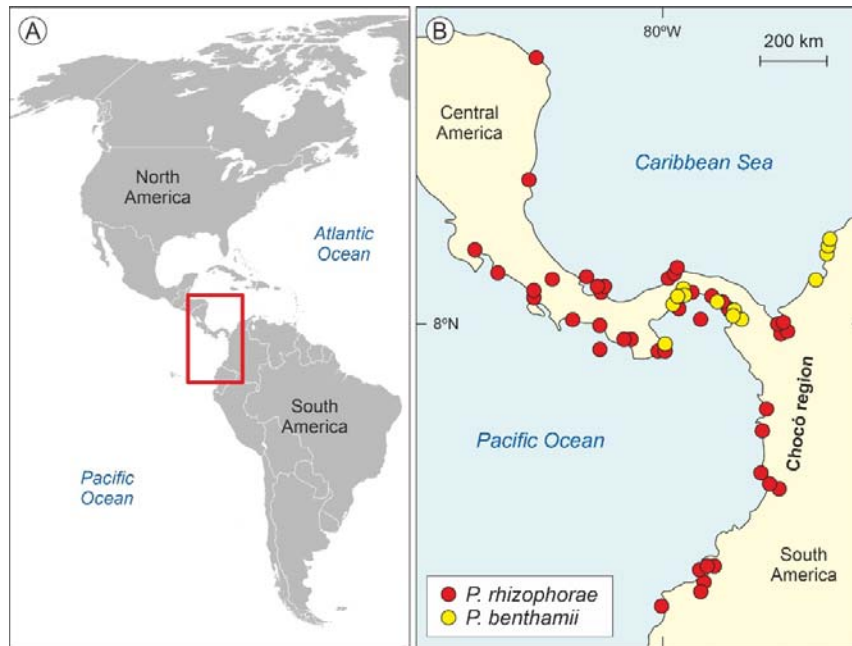

833  
834  
835  
836  
837

Figure 2

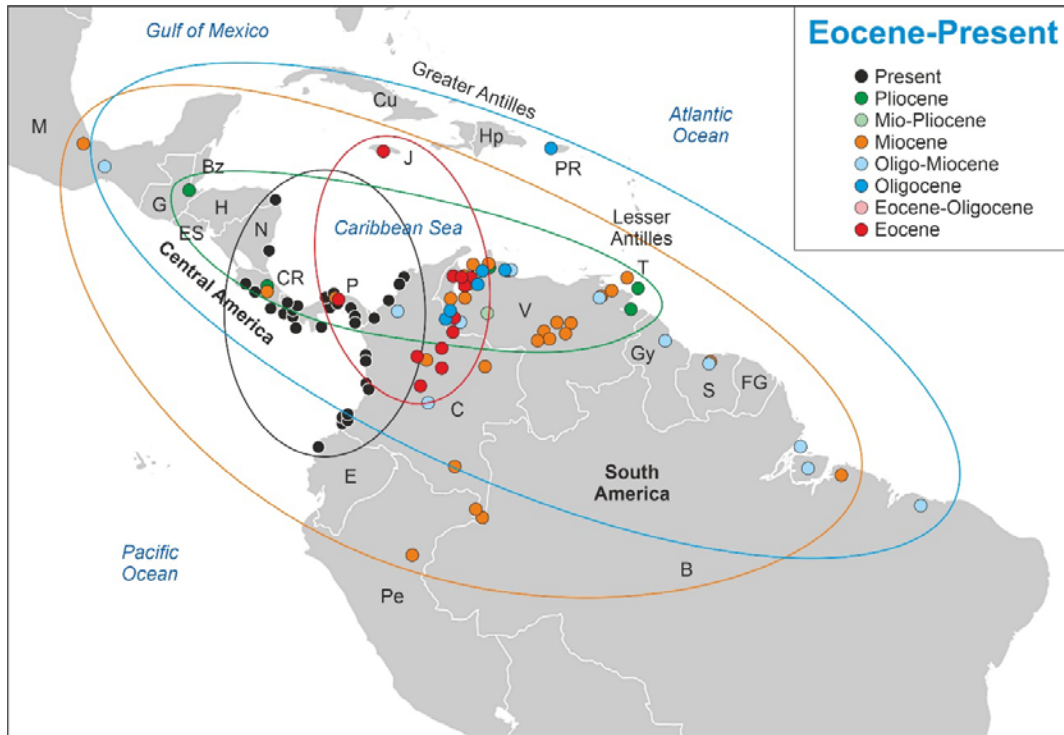

838  
839  
840  
841  
842

Figure 3

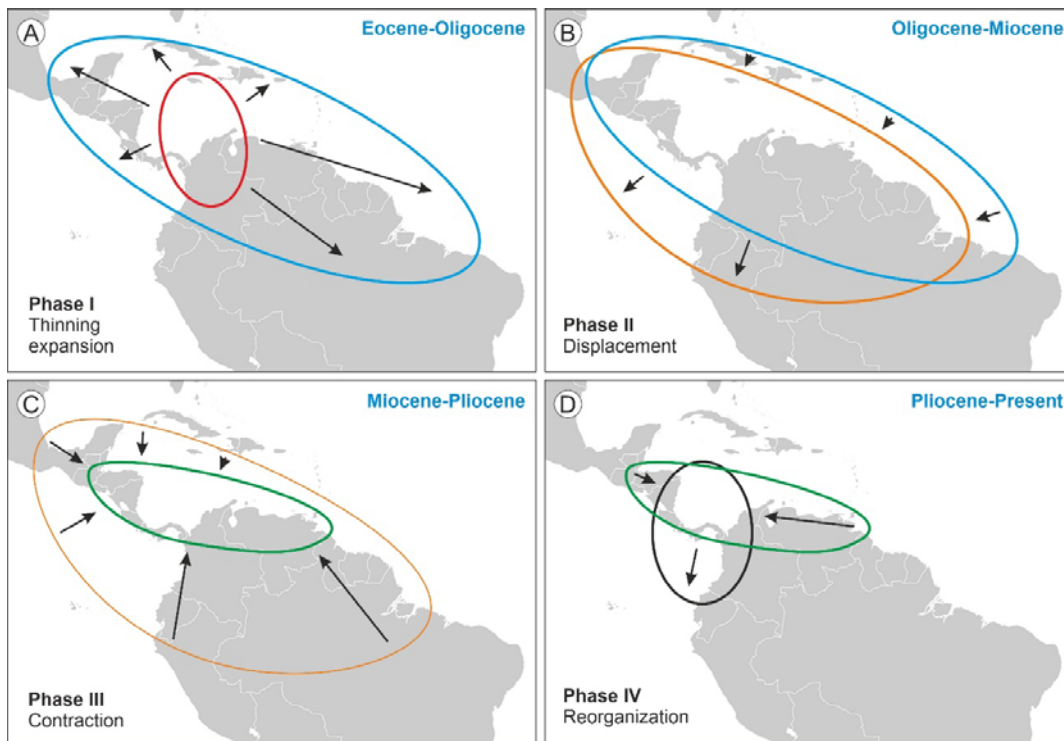

843  
844  
845  
846  
847

Figure 4

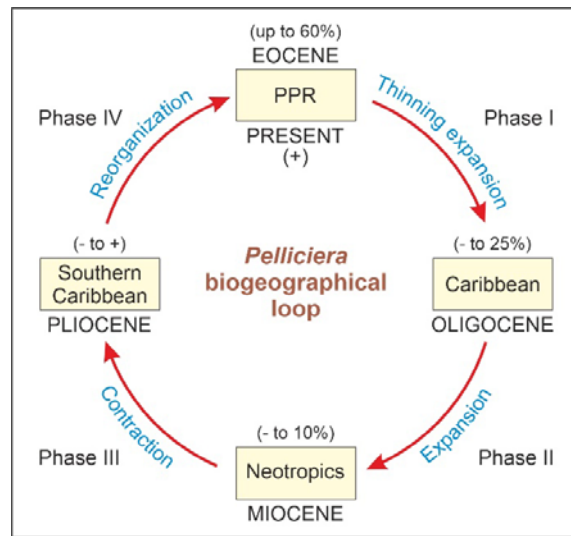

Figure 5

848  
849  
850  
851  
852

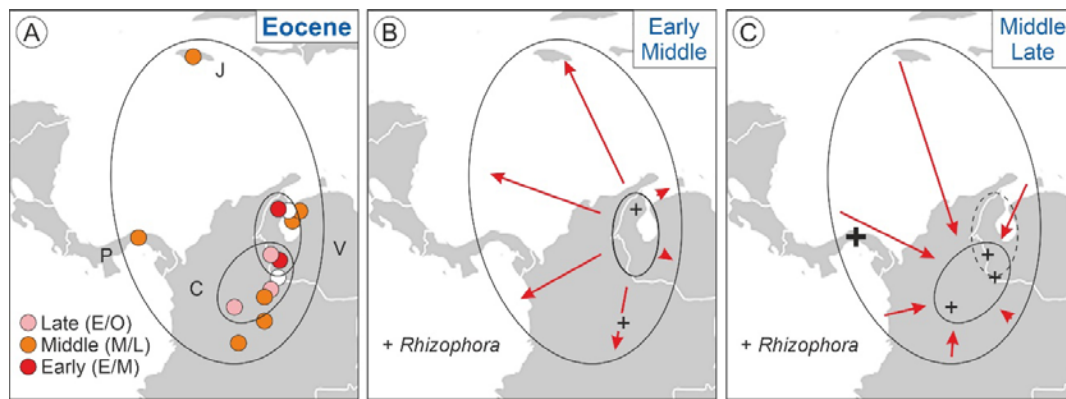

853  
854  
855

Figure 6
